# Supplementary material for: A novel electrochemiluminescence sensor based on resonance energy transfer from MoS2QDs@g-C3N4 to NH2-SiO2@PTCA for glutathione assay
Source: Royal Society of Chemistry journal article supplement (doi:10.1039/d0an01542c), 2020-01-01
Supplement: d0an01542c1.pdf [file d0an01542c1.pdf]

## Supporting Information

### **A novel electrochemiluminescence sensor based on the resonance energy transfer from MoS<sub>2</sub>QDs@g-C<sub>3</sub>N<sub>4</sub> to NH<sub>2</sub>- SiO<sub>2</sub>@PTCA for glutathione assay**

*Jingxian Li,<sup>a</sup> Xueling Shan,<sup>a,b</sup> Ding Jiang,<sup>a,b</sup> Yuru Wang,<sup>a</sup> Zhidong Chen\*<sup>a,b</sup>*

<sup>a</sup>Jiangsu Key Laboratory of Advanced Catalytic Materials and Technology, School of  
Petrochemical Engineering, Changzhou University, Changzhou 213164, China.

<sup>b</sup>Advanced Catalysis and Green Manufacturing Collaborative Innovation Center,  
Changzhou University, Changzhou 213164, China.

Corresponding author E-mail: \*Z. Chen: [zdchen@cczu.edu.cn](mailto:zdchen@cczu.edu.cn)

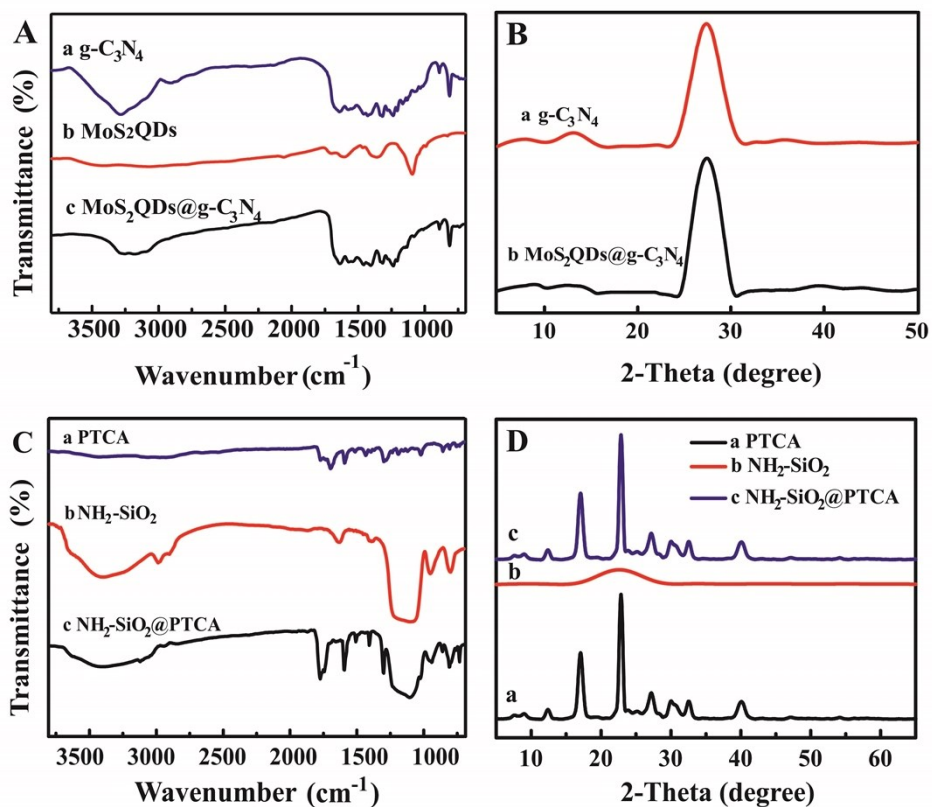

**Figure S1.** FT-IR spectrum (A) of (a) g-C<sub>3</sub>N<sub>4</sub>, (b) MoS<sub>2</sub>QDs and (c) MoS<sub>2</sub>QDs@g-C<sub>3</sub>N<sub>4</sub>. XRD pattern (B) of (a) g-C<sub>3</sub>N<sub>4</sub> and (b) MoS<sub>2</sub>QDs@g-C<sub>3</sub>N<sub>4</sub>. FT-IR (C) and XRD (D) of (a) PTCA, (b) NH<sub>2</sub>-SiO<sub>2</sub> (c) NH<sub>2</sub>-SiO<sub>2</sub>@PTCA

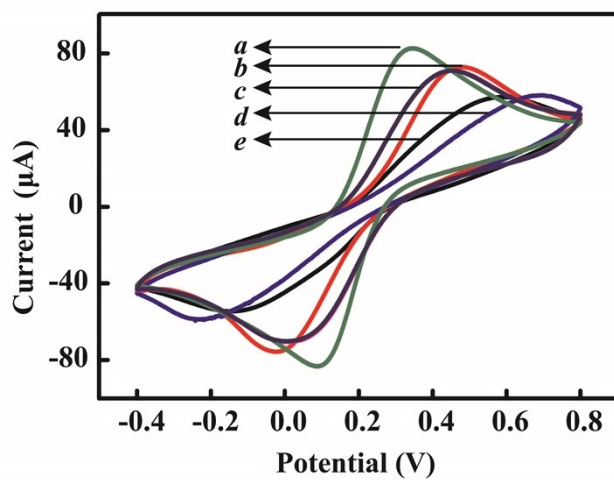

**Figure S2.** CV diagram of of GCE (a), NH<sub>2</sub>-SiO<sub>2</sub>@PTCA/GCE (b), MoS<sub>2</sub>QDs@g-C<sub>3</sub>N<sub>4</sub>/GCE (c), NH<sub>2</sub>-SiO<sub>2</sub>@PTCA/MoS<sub>2</sub>QDs@g-C<sub>3</sub>N<sub>4</sub>/GCE (d) and GSH/NH<sub>2</sub>-

SiO<sub>2</sub>@PTCA/MoS<sub>2</sub>QDs@g-C<sub>3</sub>N<sub>4</sub>/GCE (e)

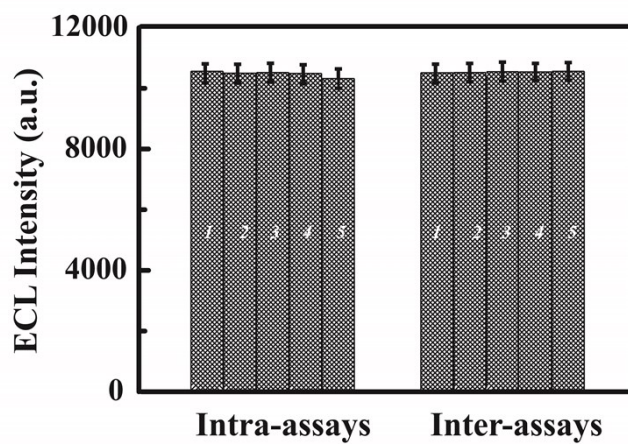

**Figure S3.** Reproducibility of the ECL sensor.

**Table S1.** Application of the ECL sensor for GSH determination in commercial samples

| Sample               | Initial amount (nM) <sup>[a]</sup> | Found amount (nM) | Recovery (%) | RSD (%) (n=3) |
|----------------------|------------------------------------|-------------------|--------------|---------------|
| Commercial medicines | 10                                 | 9.6               | 96           | 3.1           |
|                      |                                    | 9.8               | 98           |               |
|                      |                                    | 10.2              | 102          |               |

<sup>[a]</sup>The information of initial content of GSH was obtained from the commercial liquid drug.
